# Supplementary material for: Evolutionary insights from de novo transcriptome assembly and SNP discovery in California white oaks
Source: PubMed Central journal article supplement (PMC4517385; doi:10.1186/s12864-015-1761-4), 2015-07-28
Supplement: 12864_2015_1761_MOESM1_ESM.pdf [file 12864_2015_1761_MOESM1_ESM.pdf]

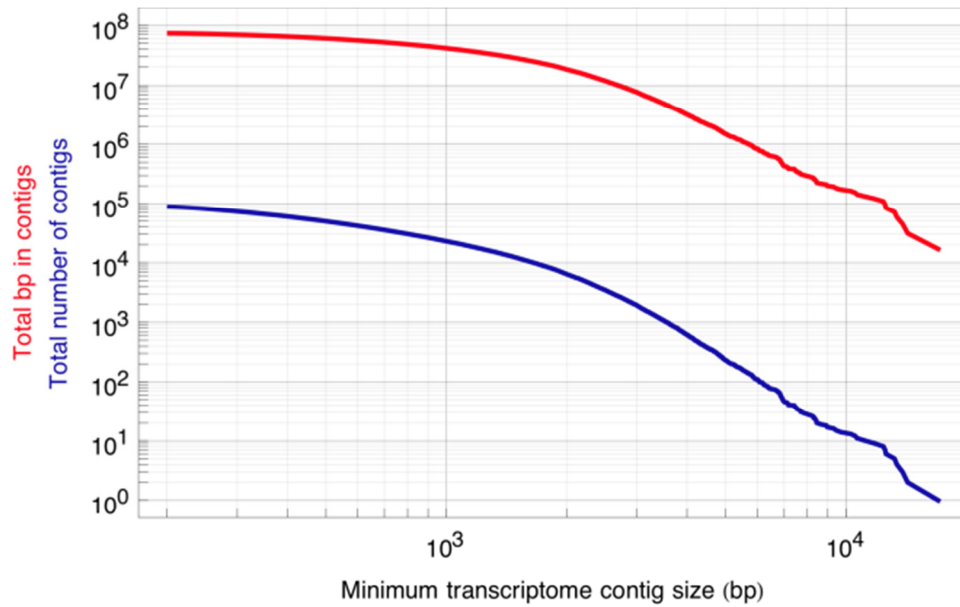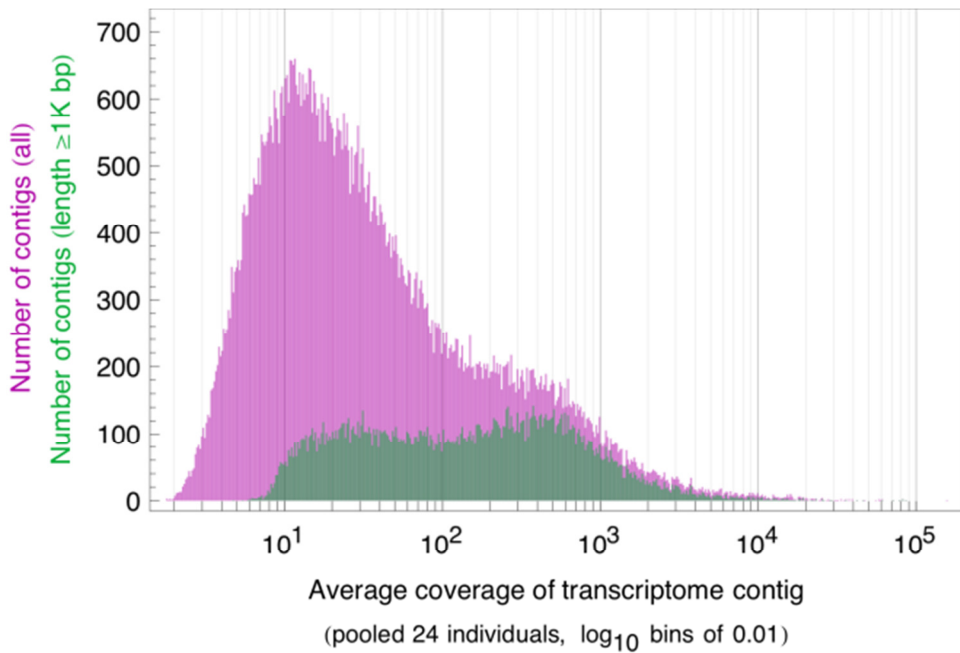

**Additional file 1: Transcriptome size and coverage per contig.**

(a) Total transcriptome size in base pairs (red) and number of contigs (blue) as minimum contig size threshold in base pairs ( $x$  axis) is varied; and (b) histogram of  $\log_{10}$  average coverage for all contigs (purple) versus contigs  $\geq 1$  kbp (green).
