# Supplementary material for: Evolutionary insights from de novo transcriptome assembly and SNP discovery in California white oaks
Source: PubMed Central journal article supplement (PMC4517385; doi:10.1186/s12864-015-1761-4), 2015-07-28
Supplement: 12864_2015_1761_MOESM2_ESM.pdf [file 12864_2015_1761_MOESM2_ESM.pdf]

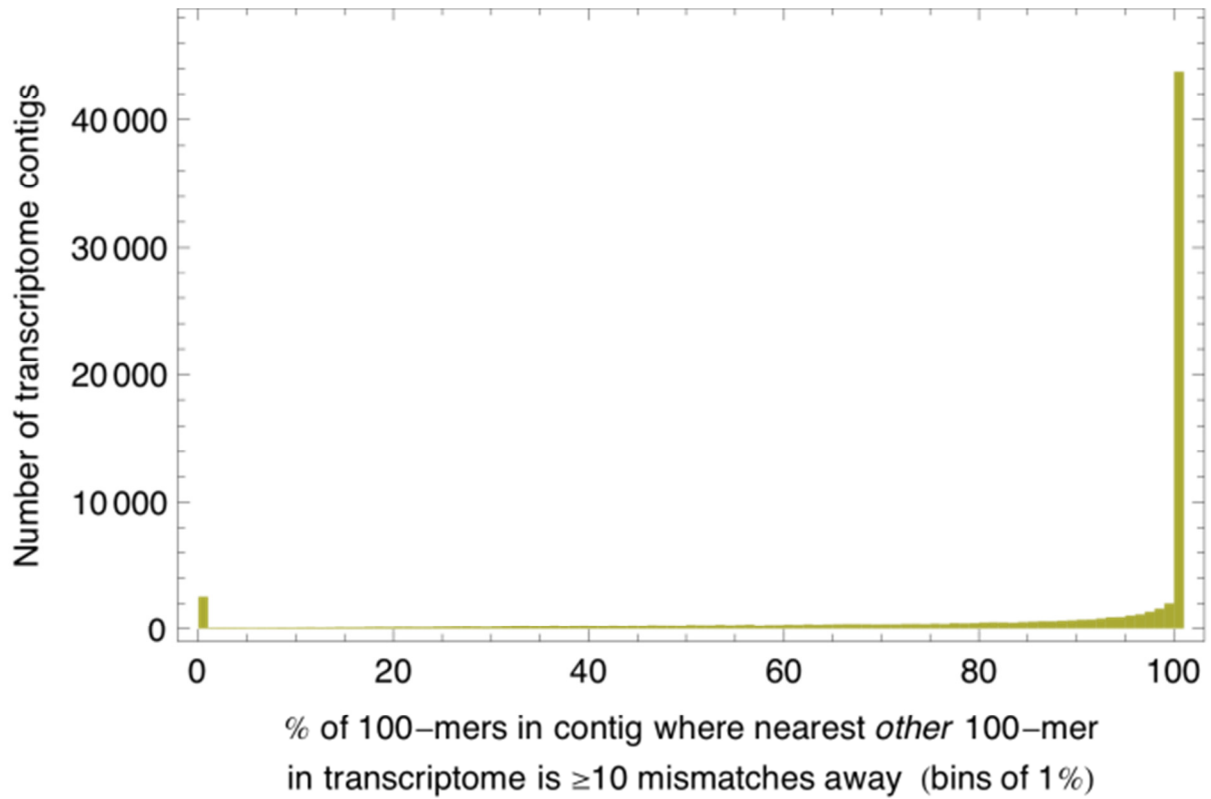

**Additional file 2: Uniqueness of contigs.**

Distribution of transcriptome contigs by percent of 100-mers that are  $\geq 10$  mismatches away from the nearest other 100-mer in the entire transcriptome.
