# Supplementary material for: Evolutionary insights from de novo transcriptome assembly and SNP discovery in California white oaks
Source: PubMed Central journal article supplement (PMC4517385; doi:10.1186/s12864-015-1761-4), 2015-07-28
Supplement: 12864_2015_1761_MOESM3_ESM.pdf [file 12864_2015_1761_MOESM3_ESM.pdf]

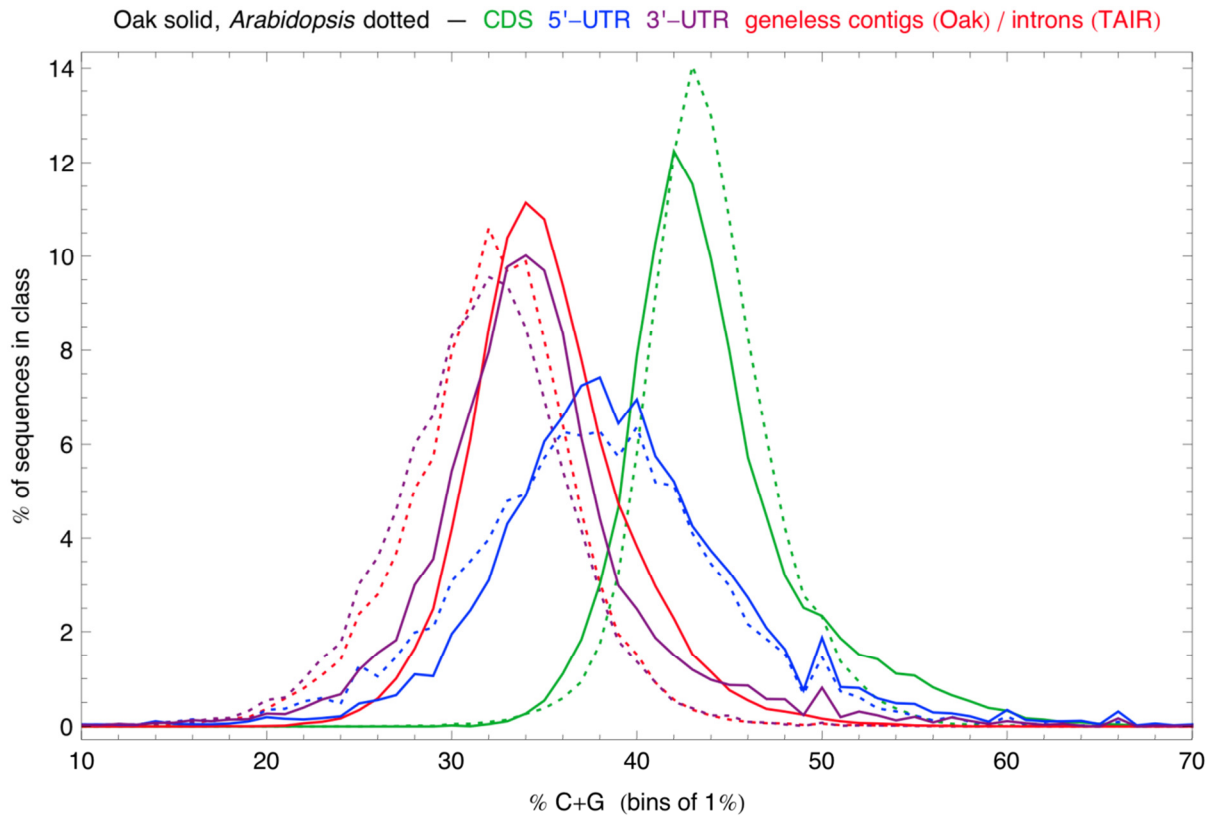

### Additional file 3: C+G content in oak and *Arabidopsis*.

Distribution of C+G content for certain populations of nucleotide sequences (oak solid lines, *Arabidopsis* dotted lines): coding sequences from all gene models (green, TAIR file TAIR10\_cds\_20110103\_representative\_gene\_model\_updated), 5'-UTRs (blue, TAIR file TAIR10\_5\_utr\_20101028), 3'-UTRs (magenta, TAIR file TAIR10\_3\_utr\_20101028), and entire contigs for oak contigs having no gene models (solid red) or all *Arabidopsis* intron sequences (dotted red, TAIR file TAIR10\_intron\_20101028).
