# Supplementary material for: Evolutionary insights from de novo transcriptome assembly and SNP discovery in California white oaks
Source: PubMed Central journal article supplement (PMC4517385; doi:10.1186/s12864-015-1761-4), 2015-07-28
Supplement: 12864_2015_1761_MOESM4_ESM.pdf [file 12864_2015_1761_MOESM4_ESM.pdf]

| <b>Database</b>              | <b><i>Q. lobata</i></b> | <b><i>Q. alba</i> EST</b> | <b><i>Q. robur</i> EST</b> |
|------------------------------|-------------------------|---------------------------|----------------------------|
| <i>Q. lobata</i> (this work) | —                       | 79%                       | 63%                        |
| <i>Q. alba</i> EST           | 19%                     | —                         | 32%                        |
| <i>Q. robur</i> EST          | 55%                     | 87%                       | —                          |

**Additional file 4: Overlap in gene content among oak RNA data sets.**

Pairwise comparison of percentage of transcripts from each transcriptome appearing in the other.
