# Supplementary material for: Evolutionary insights from de novo transcriptome assembly and SNP discovery in California white oaks
Source: PubMed Central journal article supplement (PMC4517385; doi:10.1186/s12864-015-1761-4), 2015-07-28
Supplement: 12864_2015_1761_MOESM7_ESM.pdf [file 12864_2015_1761_MOESM7_ESM.pdf]

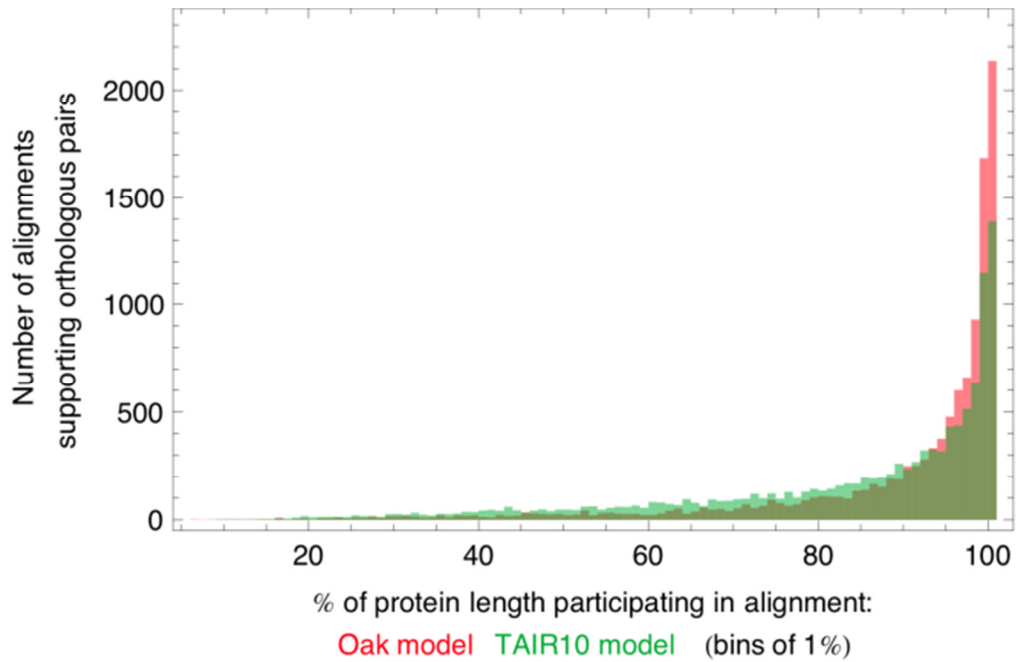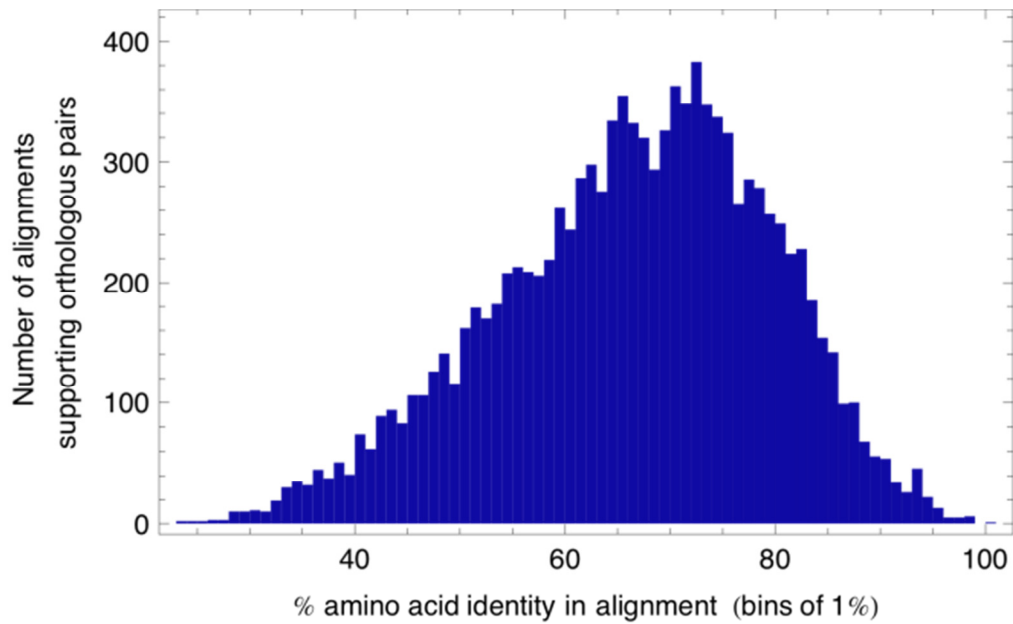

**Additional file 7: Summary of alignments between oak and *Arabidopsis* orthologs.** Histograms of (a) the percent of protein length participating and (b) the percent amino acid identity of amino acid alignments for *Arabidopsis*–*Quercus* orthologous genes.
