# Supplementary material for: Evolutionary insights from de novo transcriptome assembly and SNP discovery in California white oaks
Source: PubMed Central journal article supplement (PMC4517385; doi:10.1186/s12864-015-1761-4), 2015-07-28
Supplement: 12864_2015_1761_MOESM8_ESM.pdf [file 12864_2015_1761_MOESM8_ESM.pdf]

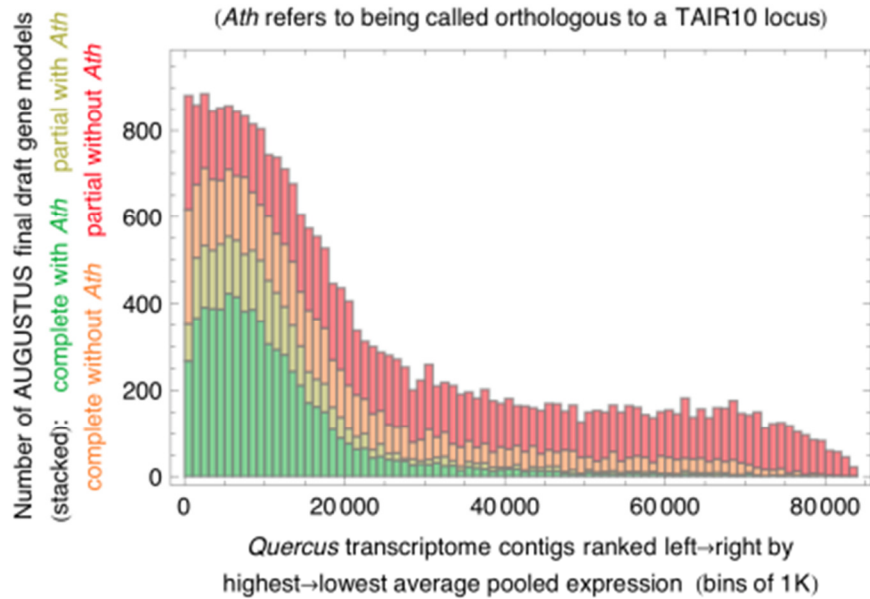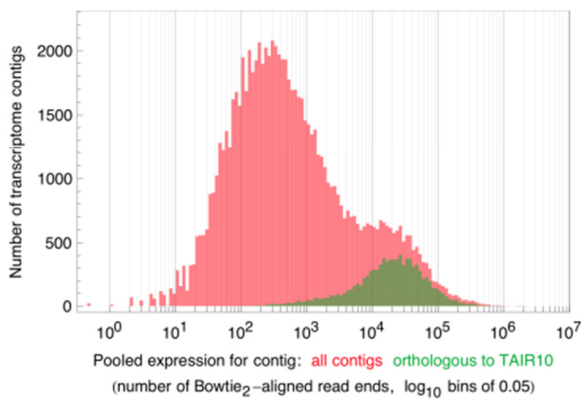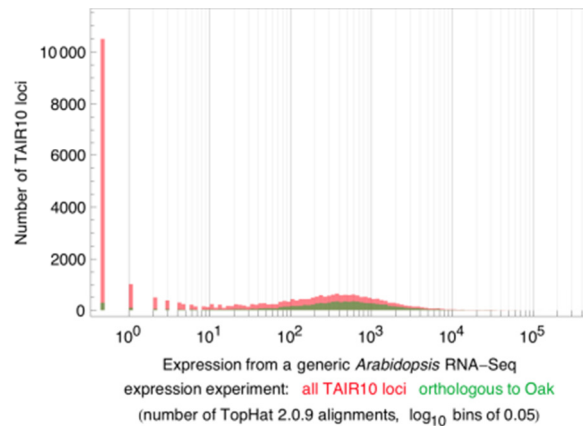

**Additional file 8: Comparison of number of and expression level of gene models with and without oak-*Arabidopsis* orthologous pairing.**

Histograms by expression level of (a) the number of gene models that are complete and have a called *Arabidopsis* ortholog (green), partial with an ortholog (yellow), complete without an ortholog (orange), or partial without an ortholog (red); (b) the number of contigs by pooled expression for all contigs (red) versus those with orthologs (green); and (c) the number of *Arabidopsis* genes by expression levels in a generic *Arabidopsis* RNA-Seq experiment (NCBI SRX145413 [43], red) versus only those with a called oak ortholog (green).
