# Supplementary material for: Evolutionary insights from de novo transcriptome assembly and SNP discovery in California white oaks
Source: PubMed Central journal article supplement (PMC4517385; doi:10.1186/s12864-015-1761-4), 2015-07-28
Supplement: 12864_2015_1761_MOESM9_ESM.pdf [file 12864_2015_1761_MOESM9_ESM.pdf]

Comparison of expression between members of orthologous pairs,  
line = least squares best fit slope 1 on pairs with *Arabidopsis*  $\geq 20$ :

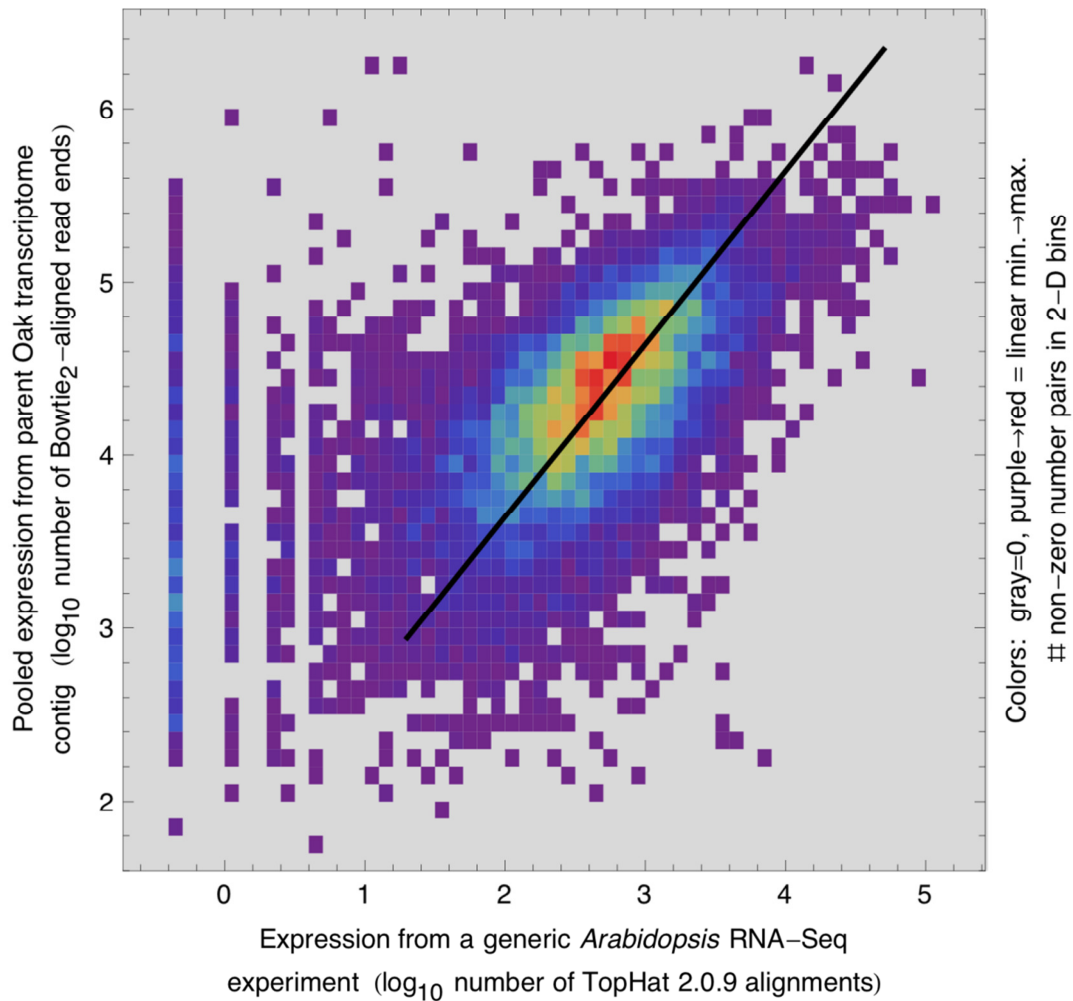

**Additional file 9: Expression level in oak versus *Arabidopsis* orthologs.**

Two-dimensional histogram of pooled oak expression from oak transcriptome contigs versus expression of the orthologous *Arabidopsis* gene in a generic *Arabidopsis* RNA-Seq experiment (NCBI SRX145413 [43]).
