# Supplementary material for: Evolutionary insights from de novo transcriptome assembly and SNP discovery in California white oaks
Source: PubMed Central journal article supplement (PMC4517385; doi:10.1186/s12864-015-1761-4), 2015-07-28
Supplement: 12864_2015_1761_MOESM12_ESM.pdf [file 12864_2015_1761_MOESM12_ESM.pdf]

|   | A      | C     | D      | E     | F     | G      | H     | I      | K     | L      | M     | N     | P      | Q     | R      | S      | T      | V      | W   | Y   | *     |
|---|--------|-------|--------|-------|-------|--------|-------|--------|-------|--------|-------|-------|--------|-------|--------|--------|--------|--------|-----|-----|-------|
| A | 23,742 |       |        |       |       |        |       |        |       |        |       |       |        |       |        |        |        |        |     |     |       |
| C |        | 3,836 |        |       |       |        |       |        |       |        |       |       |        |       |        |        |        |        |     |     |       |
| D | 1,268  |       | 11,243 |       |       |        |       |        |       |        |       |       |        |       |        |        |        |        |     |     |       |
| E | 1,571  |       | 7,756  | 7,545 |       |        |       |        |       |        |       |       |        |       |        |        |        |        |     |     |       |
| F |        | 368   |        |       | 6,237 |        |       |        |       |        |       |       |        |       |        |        |        |        |     |     |       |
| G | 2,582  | 785   | 4,096  | 3,064 |       | 16,190 |       |        |       |        |       |       |        |       |        |        |        |        |     |     |       |
| H |        |       | 1,159  |       |       |        | 4,875 |        |       |        |       |       |        |       |        |        |        |        |     |     |       |
| I |        |       |        |       | 1,220 |        |       | 10,550 |       |        |       |       |        |       |        |        |        |        |     |     |       |
| K |        |       |        | 7,285 |       |        |       | 560    | 5,900 |        |       |       |        |       |        |        |        |        |     |     |       |
| L |        |       |        |       | 5,936 |        | 1,150 | 3,853  |       | 32,052 |       |       |        |       |        |        |        |        |     |     |       |
| M |        |       |        |       |       |        |       | 4,400  | 1,195 | 2,441  |       |       |        |       |        |        |        |        |     |     |       |
| N |        |       | 7,094  |       |       |        | 1,523 | 945    | 5,130 |        |       | 8,817 |        |       |        |        |        |        |     |     |       |
| P | 1,694  |       |        |       |       |        | 906   |        |       | 4,734  |       |       | 17,944 |       |        |        |        |        |     |     |       |
| Q |        |       |        | 3,033 |       |        | 3,153 |        | 2,084 | 1,515  |       |       | 974    | 5,882 |        |        |        |        |     |     |       |
| R |        | 3,747 |        |       |       | 3,966  | 5,744 | 574    | 5,027 | 1,131  | 627   |       | 932    | 6,037 | 11,859 |        |        |        |     |     |       |
| S | 4,423  | 2,400 |        |       | 2,483 | 5,026  |       | 1,190  |       | 4,811  |       | 6,316 | 5,135  |       | 2,790  | 27,118 |        |        |     |     |       |
| T | 10,143 |       |        |       |       |        |       | 6,014  | 1,542 |        | 3,026 | 1,857 | 1,692  |       | 991    | 5,863  | 18,627 |        |     |     |       |
| V | 10,574 |       | 1,182  | 1,775 | 1,461 | 2,005  |       | 12,365 |       | 5,405  | 3,377 |       |        |       |        |        |        | 16,664 |     |     |       |
| W |        | 419   |        |       |       | 227    |       |        |       | 321    |       |       |        |       | 1,951  | 232    |        |        |     |     |       |
| Y |        | 2,243 | 1,351  |       | 2,355 |        | 3,061 |        |       |        |       | 1,215 |        |       |        | 1,337  |        |        |     |     | 6,101 |
| * |        | 85    |        | 317   | 507   | 90     |       |        | 159   | 131    |       |       |        | 902   | 610    | 195    |        |        | 505 | 203 | 310   |

**Additional file 12: Pairwise amino acid changes inferred from SNPs inside coding sequence of gene models.**

Amino acids are given by IUPAC single letter codes (with \* for STOPS).
