# Supplementary material for: Evolutionary insights from de novo transcriptome assembly and SNP discovery in California white oaks
Source: PubMed Central journal article supplement (PMC4517385; doi:10.1186/s12864-015-1761-4), 2015-07-28
Supplement: 12864_2015_1761_MOESM13_ESM.pdf [file 12864_2015_1761_MOESM13_ESM.pdf]

Restrict to AA  $x \rightarrow y$  types that occur in Oak SNP reference  $\rightarrow$  variant, then  
for each  $x$  consider the probability distribution on  $y$  conditioned on  $y \neq x$

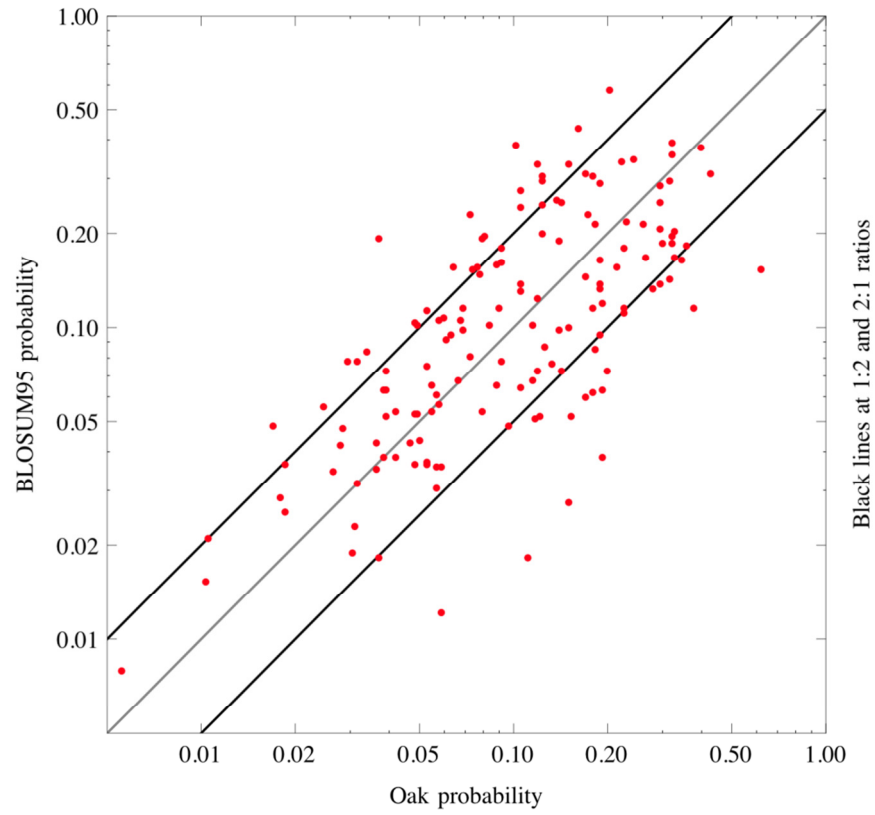

**Additional file 13: Concordance of amino acid change distributions between oak and standard NCBI BLOSUM95.**
